# Supplementary material
Source: Research Square preprint supplement (doi:10.21203/rs.3.rs-9198555/v1)
Supplement: Supplementary file 1 [file 0e1235c6519e70f2d8da691b.docx]

Appendix 1: Implementers’ fidelity to dissemination and implementation strategies

Appendix 1a: Items and registrations:

- To what degree was the content delivered as planned? (0-4 point Likert scale)
- Was any planned content not delivered or addressed? (Yes/no + free text for details)
- Were there any other adaptations? (Yes/no + free text for details)
- To what degree was the content delivered with quality? (0-4 point Likert scale)
- Did anything happen that reduced the quality? (Yes/no + free text for details)
- Were there any other instances or events that might have affected the strategy? (Yes/no + free text for details)
- Dosage (free text)
- Attendance (free text)
- Fidelity consistency (yes/no + free text for details). Coded by coordinators during the study, discussed with the project group when necessary, and reviewed in detail by implementation specialist (co-author Thomas Engell) after the study.

| **Implementation strategy** | **Adherence* (sd)** | **Quality* (sd)** | **Dose** | **Attendence** | **Absent (%)** | **Fidelity inconsistent adaptations** | **Fidelity consistent adaptation** |
| --- | --- | --- | --- | --- | --- | --- | --- |
| Kick off wave 1  all conditions | 4 | 4 | 60 min | 30 | 0 |  |  |
| Kick off wave 2  all conditions | 4 | 3 | 75 min | 63 | 0 |  | Slight change to content, no influence on fidelity. Longer session than w1 due to fixing sound difficulties for online participants |
| Introduction to **Audit and feedback+** w1 | 3.5 | 3.5 | Group 1:180 min, group 2: 195 min | Group 1: 2, group 2: 7 | 3 |  |  |
| Introduction to **Audit and feedback+** w2 | 4 | 3 | Group 1: 180 min, group 2: 225 min | Group 1: 3, group 2: 15 | 0 |  | Training for group 1 was more effective due to fewer participants |
| Introduction to **Audit and feedback+** for absentees w1 and w2 | 4 | 4 | Group 1: 60 min, group 2 90 min, group 3: 105 min | Group 1: 1, group 2: 2, group 3: 1 | 0 |  | Group one had only 1 participant, which made the introduction more effective, group 3 was longer because of more questions and informal conversations prolonging the session. Content was the same across groups |
| Introduction to **Ongoing consultation** w1 | 4 | 4 | 68 min | 8 | 0 | Less theoretical content than planned due to tired participants |  |
| Introduction to **Ongoing consultation** n w2 | 4 | 4 | 45 min | Group 1: 10, group 2: 8 | 0 |  | Details about the study were reduced because it was considered unnecessary based on experience from wave 1 |
| Introduction to **Dissemination** w2 | 4 | 4 | 45 min | 39 | 0 |  | Cut back on introductory information about the project in wave 2. Main content remained the same |
| **Ongoing consultation** w1 and 2 | 3.89 (.33) | 3.89 (.33) | m = 555 min (77.94) | m = 7.11 (1.90) | M = 1.2 (1.1) | - More than half had not watched the preparatory videos before the first session  - Missing case for discussion in one session due to absenteeism  - A leader participating in one session |  |
| Introduction D**issemination** w1 | 4 | 3 | 105 min | 19 | 0 |  |  |

* Self-report rating on a 0-4 Likert scale ranging from “not at all” to “ a very large degree”

Appendix 1b: Technical assistance received across conditions

Registration of all phone calls, emails, and text messages from research staff to participants in each condition. All research staff were instructed to minimize technical assistance (TA) that could be experienced as implementation support and potentially influence the experimental conditions. Details about the reason for contact were described, and the contact was coded for potential relevance to experimental conditions.

| **Condition** | **Technical assistance (TA) relevant to conditions** | | | | **TA not relevant to conditions** | | **Total TA** | | |
| --- | --- | --- | --- | --- | --- | --- | --- | --- | --- |
|  | **Phone calls with support** | **Emails with support** | **Adaptations/**  **Emergent events** | **Note** | **Phone** | **Email/texts** | **Phone** | **Email/texts** | **Total** |
| **Audit and feedback+** | 1 | 1 | 0 |  | 10 | 13 | 11 | 14 | 25 |
| **Ongoing consultation** | 0 | 0 | 0 |  | 8 | 10 | 8 | 10 | 18 |
| **Dissemination** | 2 | 5 | 2 | HN on sick leave during time for conducting consultations, external help brought in upon return to manage workload. Some training given to the extra HN | 20 | 22 | 22 | 27 | 49 |
| **Audit and feedback+/ Ongoing consultation** | 1 | 2 | 2 | Technical problems with web dialog postponed consultations, HN maternity leave and new HN not hired due to financial issues in the municipality | 9 | 18 | 10 | 20 | 30 |
| **Audit and feedback+/**  **Dissemination** | 1 | 1 | 0 |  | 8 | 12 | 9 | 13 | 22 |
| **Ongoing consultation** +/ **Dissemination** | 2 | 0 | 0 |  | 5 | 14 | 7 | 14 | 21 |
| **Audit and feedback+/ Ongoing consultation** / **Dissemination** | 6 | 7 | 2 | Study paused at one school due to unrelated crisis, one dropout due to sick leave on HN | 15 | 16 | 21 | 23 | 44 |
| **Regular practice** | 0 | 0 | 1 | Turnover HN | 9 | 13 | 9 | 13 | 22 |
