# Supplementary material
Source: Research Square preprint supplement (doi:10.21203/rs.3.rs-9198555/v1)
Supplement: Supplementary file 2 [file 2f1d52f4ac7cfa9bafa3bfdf.docx]

**Appendix 6a: Description of fidelity by experimental group reported by students**

|  | **Experimental Condition, Student report** | | | | | | | |
| --- | --- | --- | --- | --- | --- | --- | --- | --- |
|  | 1 | 2 | 3 | 4 | 5 | 6 | 7 | 8 |
| **Audit and feedback+** | + | + | + | + | - | - | - | - |
| **Ongoing consultation** | + | + | - | - | + | + | - | - |
| **Dissemination** | + | - | + | - | + | - | + | - |
|  | n = 261 | n = 162 | n = 224 | n = 150 | n = 117 | n = 191 | n = 171 | n = 124 |
| **Adherence total (0-10)** | |  |  |  |  |  |  |  |
| M (SD) | 6.51 (1.89) | 6.27 (1.99) | 7.04 (1.84) | 6.52 (1.63) | 7.34 (1.70) | 8.15 (2.00) | 8.06 (1.71) | 7.27 (2.13) |
| **Adherence to themes (0-8)** | | |  |  |  |  |  |  |
| M (SD) | 4.57 (1.84) | 4.43 (1.86) | 5.16 (1.71) | 4.59 (1.52) | 5.41(1.63) | 6.17 (1.99) | 6.16 (1.67) | 5.35 (2.00) |
| **Alliance (0-12)** | | |  |  |  |  |  |  |
| M (SD) | 10.33 (1.88) | 10.68 (1.50) | 10.45 (1.67) | 9.89 (1.98) | 10.09 (1.95) | 10.14 (1.85) | 10.37 (1.89) | 9.88 (1.76) |
| **Quality in adherence (0-20)** | |  |  |  |  |  |  |  |
| M (SD) | 15.32 (3.08) | 15.20 (2.83) | 15.95 (2.82) | 14.58 (2.88) | 14.83 (2.99) | 15.39 (2.97) | 15.16 (3.02) | 14.29 (2.84) |
| **Tailoring (0-12)** | |  |  |  |  |  |  |  |
| M (SD) | 7.87 (2.34) | 7.78 (2.26) | 8.12 (2.11) | 7.37 (2.11) | 7.54 (2.31) | 7.64 (2.26) | 7.78 (2.21) | 7.06 (2.12) |
|  | |  |  |  |  |  |  |  |

##

## Appendix 6b: Description of fidelity by experimental group reported by school nurses

|  | **Experimental Condition, School nurse report** | | | | | | | |
| --- | --- | --- | --- | --- | --- | --- | --- | --- |
|  | 1 | 2 | 3 | 4 | 5 | 6 | 7 | 8 |
| **Audit and feedback+** | + | + | + | + | - | - | - | - |
| **Ongoing consultation** | + | + | - | - | + | + | - | - |
| **Dissemination** | + | - | + | - | + | - | + | - |
|  | n = 265 | n = 159 | n = 225 | n = 151 | n = 120 | n = 191 | n = 182 | n = 124 |
| **Adherence total (0-10)** | |  |  |  |  |  |  |  |
| M (SD) | 7.56 (2.18) | 7.79 (1.98) | 8.21 (1.85) | 7.90 (1.86) | 9.05 (0.72) | 9.33 (1.10) | 9.20 (1.08) | 9.66 (1.21) |
| **Adherence to themes (0-8)** | | |  |  |  |  |  |  |
| M (SD) | 5.38 (2.07) | 5.72 (1.68) | 6.15 (1.47) | 5.72 (1.59) | 7.08 (0.67) | 7.29 (0.96) | 7.24 (0.82) | 7.37 (0.97) |
| **Tailoring (0-12)** | | |  |  |  |  |  |  |
| M (SD) | 8.24 (1.54) | 8.42 (1.56) | 8.36 (1.45) | 8.01 (1.34) | 7.58 (1.44) | 8.13 (1.26) | 7.95 (2.14) | 8.65 (1.65) |
| **Quality in adherence (0-20)** | |  |  |  |  |  |  |  |
| M (SD) | 13.70 (2.44) | 13.70 (2.07) | 13.45 (1.84) | 12.85 (1.83) | 13.27 (1.82) | 12.97 (1.75) | 13.19 (2.50) | 14.14 (2.10) |
| **Consultation Duration (mns)** | |  |  |  |  |  |  |  |
| M (SD) | 29.28 (9.79) | 34.75 (12.64) | 34.40 (13.75) | 26.28 (9.24) | 26.12 (7.45) | 27.93 (9.79) | 30.12 (10.01) | 33.84 (19.27) |
