# Supplementary material
Source: Research Square preprint supplement (doi:10.21203/rs.3.rs-9198555/v1)
Supplement: Supplementary file 3 [file 751127b080c219806cdba527.docx]

Appendix 2: Items covering fidelity to guideline recommendations reported by both school nurses and students

| **Domain** | **Scale** | | **Item** | | **Values** | **Range** | **Informant** |
| --- | --- | --- | --- | --- | --- | --- | --- |
| **Adherence** | **Total adherence** | | Items covering Adherence to physical assessments + Adherence to themes (see below) | |  | 0-11  0-10 | School nurse  Student |
| **Adherence to physical assessments** | | Student’s *height*  Your *height* | | (0) Not measured  (1) Measured  (1) The student/I did not want to measure | 0-1  0-1 | School nurse  Student |
| Your *weight* | | (0) Not measured  (1) Measured  (1) I did not want to measure | 0-1 | Student |
| Student’s *weigth* | | (0) Not measured  (0.5) Measured  (1) The student did not want to measure | 0-1 | School nurse |
| Was the student partially undressed during *weight* measurement? | | (0) No, the student was not asked to do so |
| (0.5) Yes |
| (0.5) No, the student did not want to |
| Has a standing *posture assessment* been conducted to evaluate symmetry? | | (0) No | 0-1 | School nurse |
| (1) Yes |
| **Adherence to themes** | | *Which topics were discussed during the consultation?* | | For each topic: (0) No (1) Yes | 0-8  0-8 | School nurse  Student |
|  | Dental health |
|  | Sexual health (*Puberty and sexuality*) |
|  | Physical activity, leisure activities, and sedentary behavior (*includes screen activities*) |
|  | Sleep and sleep habits |
|  | Diet and eating habits |
|  | Tobacco, alcohol, and drugs |
|  | Well-being, coping, and relationships (*Mood and emotions, Friends, Family, School performance, School well-being, Bullying, Other adverse life events*) |
|  | Violence, abuse, and neglect |
| **Quality, school nurse** | **Tailoring** | | *Based on your perception of the conversation, to what extent…* | | (0) Not at all (1) To a small extent (2) To some extent (3) To a large extent (4) To a very large extent | Tailoring  0-12 | School nurse |
|  | Did the conversation focus on what was important for the student? |
|  |  |  | Did you provide tailored information about habits important for the student’s health? |
|  | Did you point out habits the student has that are important for good health? |
| **Quality in adherence** | |  | Did you listen to what the student had to say? | Quality in adherence  0-20 |
|  | Do you think the student learned something about what is good for their health? |
|  | Did you feel that the student felt safe with you? |
| **Quality, student** | **Tailoring** | | *To what extent…* | | (0) Not at all (1) To a small extent (2) To some extent (3) To a large extent (4) To a very large extent | Tailoring  0-12 | Student |
|  | Did the conversation focus on what was important to you? |
|  |  |  | Did you receive information about healthy habits that are important for your health? |
|  | Did the school nurse point out any habits you have that are important for good health? |
| **Quality in adherence** | |  | Did you learn something about what is good for your health? | Quality in adherence  0-20 |
|  | Did the school nurse speak in a way that you understood? |
|  | Do you think the school nurse listened to what you had to say? |
| **Alliance** | |  | Were you welcomed well by the school nurse? | Alliance  0-12 |
|  | Is the school nurse someone you can talk to if something is bothering you? |
|  | Did you feel safe with the school nurse? |
