# Supplementary material
Source: Research Square preprint supplement (doi:10.21203/rs.3.rs-9198555/v1)
Supplement: Supplementary file 5 [file 9b5b9073e4d4da17b8469afa.docx]

**Appendix 5: Engagement in implementation strategies across conditions**

|  | **School nurses** | **Dose** |
| --- | --- | --- |
| **Audit and feedback+ (n= 26)** | n (%) |  |
| **Individualized Feedback Report** |  |  |
| Extent of use in *preparation* for the consultation (percent of all consultations) |  |  |
| Never used (0%) | 0 |  |
| Rarely used (5, 10, 15%) | 1 (3.85) |  |
| Occasionally used (20, 25, 30, 35%) | 1 (3.85) |  |
| Sometimes used (40, 45, 50, 55%) | 1 (3.85) |  |
| Often used (60, 65, 70 75%) | 0 |  |
| Very often used (80, 85, 90, 95%) | 8 (30.77) |  |
| Always used (100%) | 15 (57.69) |  |
| Extent of use *during* the consultation: |  |  |
| Never used (0%) | 0 |  |
| Rarely used (5, 10, 15%) | 0 |  |
| Occasionally used (20, 25, 30, 35%) | 0 |  |
| Sometimes used (40, 45, 50, 55%) | 1 (3.85) |  |
| Often used (60, 65, 70 75%) | 3 (11.54) |  |
| Very often used (80, 85, 90, 95%) | 4 (15.38) |  |
| Always used (100%) | 18 (69.23) |  |
| **School Report** |  |  |
| Used | 19 (73.08) |  |
| Not used | 7 (26.92) |  |
| **User Satisfaction Report** |  |  |
| Used | 19 (73.08) |  |
| Not used | 7 (26.92) |  |
| **Consultation Report** |  |  |
| Used | 14 (53.85) |  |
| Not used | 12 (46.15) |  |
| **Ongoing consultation (n=24)** | n (%) |  |
| E-learning module: **theory** |  |  |
| Used to a very small degree | 2 (8.33) |  |
| Used to a small degree | 2 (8.33) |  |
| Used to some degree | 5 (20.83) |  |
| Used to a large degree | 9 (37.50) |  |
| Used to a very large degree | 6 (25.00) |  |
| E-learning module: **video** |  |  |
| Used to a very small degree | 2 (8.33) |  |
| Used to a small degree | 3 (12.50) |  |
| Used to some degree | 5 (20.83) |  |
| Used to a large degree | 6 (25.00) |  |
| Used to a very large degree | 8 (33.33) |  |
| **Ongoing Consultations** |  | *Minutes* |
| Ongoing consultation sessions, wave 1 (n=6, one group) |  |  |
| Attendance session one | 6 (100.00) | 180 |
| Attendance session two | 5 (83.33) | 195 |
| Attendance session three | 5 (83.33) | 210 |
| Ongoing consultation sessions, wave 2 (n=18, two groups) |  |  |
| Attendance session one | 17 (94.44) | 150 |
| Attendance session two | 18 (100.00) | 150 |
| Attendance session three | 13 (72.22) | 150 |
| Attendance on total number of meetings (n=24) |  |  |
| One meeting | 1 (4.17) |  |
| Two meetings | 8 (33.33) |  |
| Three meetings | 15 (62.50) |  |
| **Active Dissemination (n=27)** | n (%) |  |
| Attendance per meeting |  |  |
| Attendance first meeting | 18 (66.66) |  |
| Attendance second meeting | 11 (40.74) |  |
| Attendance third meeting | 12 (44.44) |  |
| Attendance fourth meeting | 10 (37.04) |  |
| Attendance fifth meeting | 4 (14.81) |  |
| Attendance on total number of meetings |  |  |
| No meetings | 7 (25.93) |  |
| One meeting | 7 (25.93) |  |
| Two meetings | 4 (14.81) |  |
| Three meetings | 1 (3.70) |  |
| Four meetings | 4 (14.81) |  |
| Five meetings | 4 (14.81) |  |
