# Supplementary material
Source: Research Square preprint supplement (doi:10.21203/rs.3.rs-9198555/v1)
Supplement: Supplementary file 6 [file a324a012810f9d238562302e.docx]

**Appendix 4: Effect coding matrix**

The 8 experimental conditions along with the effect-coded matrix.

| **Experi-mental**  **condition** |  | **Components** | | |  | **Effect coding matrix** | | | | | | | |
| --- | --- | --- | --- | --- | --- | --- | --- | --- | --- | --- | --- | --- | --- |
| N schools | 1. Audit and Feedback+* | 2. Ongoing Consul-tation** | 3. Active Dissemin-ation*** | |  | Audit and Feedback+ | Ongoing Consul-tation | Active Dissemi-nation. | Audit and Feedback+   x Ongoing Consultation | Audit and Feedback+   x Active Dissemination | Ongoing Consultation   x Active Dissemination | Audit and Feedback+   x Ongoing Consultation   x Active Dissemination |
| 1 | 6 | Yes | Yes | Yes | |  | +1 | +1 | +1 | +1 | +1 | +1 | +1 |
| 2 | 7 | Yes | Yes | No | |  | +1 | +1 | -1 | +1 | -1 | -1 | -1 |
| 3 | 7 | Yes | No | Yes | |  | +1 | -1 | +1 | -1 | +1 | -1 | -1 |
| 4 | 6 | Yes | No | No | |  | +1 | -1 | -1 | -1 | -1 | +1 | +1 |
| 5 | 5 | No | Yes | Yes | |  | -1 | +1 | +1 | -1 | -1 | +1 | -1 |
| 6 | 6 | No | Yes | No | |  | -1 | +1 | -1 | -1 | +1 | -1 | +1 |
| 7 | 7 | No | No | Yes | |  | -1 | -1 | +1 | +1 | -1 | -1 | +1 |
| 8 | 5 | No | No | No | |  | -1 | -1 | -1 | +1 | +1 | +1 | -1 |

* DFA/Digital feedback and administration tool

** Consult/ Dialog support

*** Col.mat.
