# Supplementary material
Source: Research Square preprint supplement (doi:10.21203/rs.3.rs-9198555/v1)

## Appendix 3: Randomisering Script in R


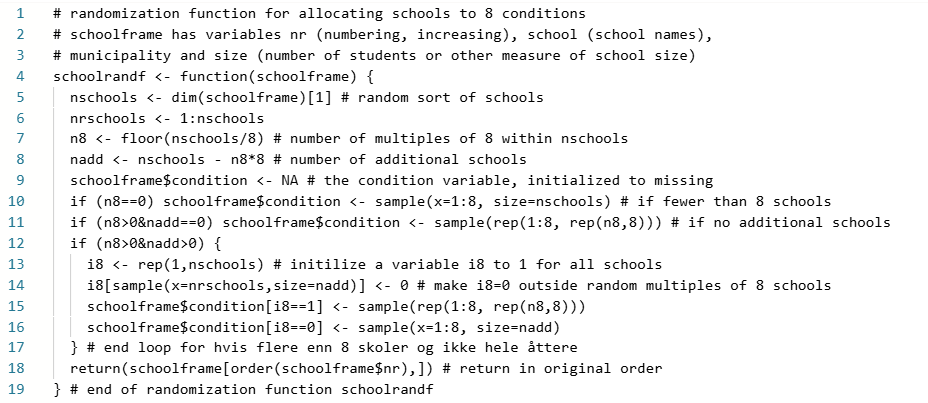

Supplement: Supplementary file 4 [file 8dc0bfccf4078eeeceb52e11.docx]
